# Supplementary material for: Hydrothermal conversion of layered hydroxide nanosheets into (Y0.95Eu0.05)PO4 and (Y0.96−xTb0.04Eux)PO4 (x = 0–0.10) nanocrystals for red and color-tailorable emission
Source: Royal Society of Chemistry journal article supplement (doi:10.1039/c6ra00434b), 2016-01-01
Supplement: c6ra00434b1.pdf [file c6ra00434b1.pdf]

## Supplementary Information

Hydrothermal Conversion of Layered Hydroxide Nanosheets into  
(Y<sub>0.95</sub>Eu<sub>0.05</sub>)PO<sub>4</sub> and (Y<sub>0.96-x</sub>Tb<sub>0.04</sub>Eu<sub>x</sub>)PO<sub>4</sub> (x = 0-0.10) Nanocrystals for  
Red and Color-Tailorable Emissions

Zhihao Wang,<sup>a</sup> Ji-Guang Li,<sup>\*a,b</sup> Qi Zhu,<sup>a</sup> Xiaodong Li,<sup>a</sup> Xudong Sun<sup>a</sup>

<sup>a</sup>*Key Laboratory for Anisotropy and Texture of Materials (Ministry of Education),  
School of Materials Science and Engineering, Northeastern University, Shenyang,  
Liaoning 110819, China*

<sup>b</sup>*Advanced Materials Processing Unit, National Institute for Materials Science,  
Namiki 1-1, Tsukuba, Ibaraki 305-0044, Japan*

\*Corresponding author

Dr. Ji-Guang Li

National Institute for Materials Science

Tel: +81-29-860-4394

E-mail: [li.jiguang@nims.go.jp](mailto:li.jiguang@nims.go.jp)

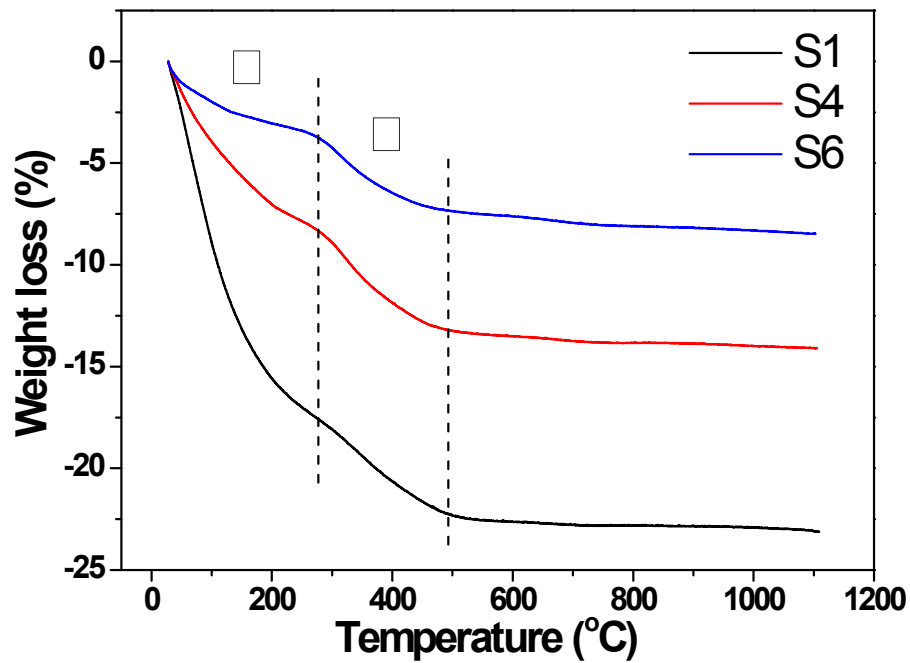

Fig. S1 TG profiles of samples S1, S4 and S6.

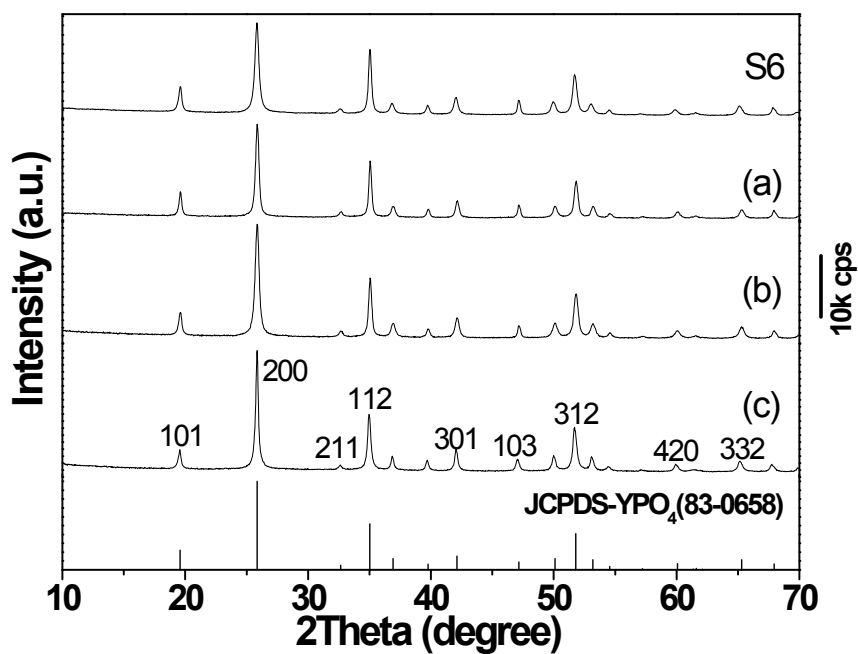

Fig. S2 XRD patterns of S6 and its products calcined at (a) 800, (b) 900 and (c) 1000 °C for 2 h under O<sub>2</sub> gas flowing at 200 mL min<sup>-1</sup>.

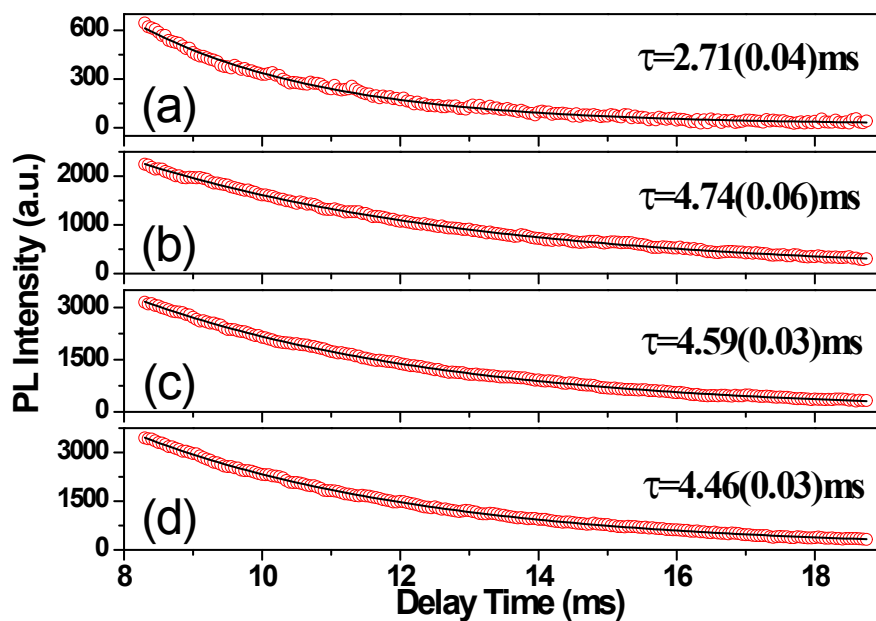

Fig. S3 Fluorescence decay curves (red) and the results of exponential fitting (black) for the 593-nm emission of S6 (a) and the products calcined from S6 at (b) 800, (c) 900 and (d) 1000 °C.

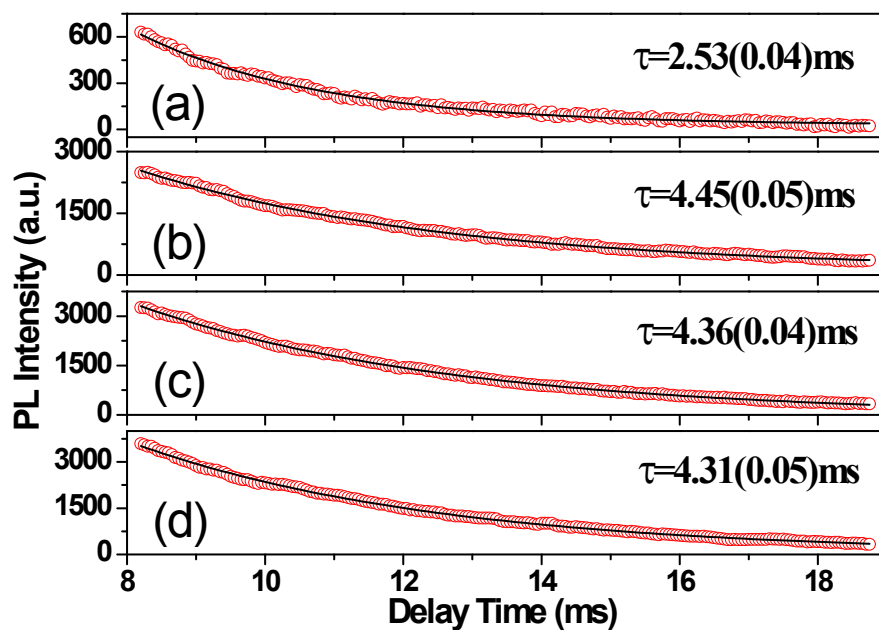

Fig. S4 Fluorescence decay curves (red) and the results of exponential fitting (black) for the 618-nm emission of S6 (a) and the products calcined from S6 at (b) 800, (c) 900 and (d) 1000 °C.

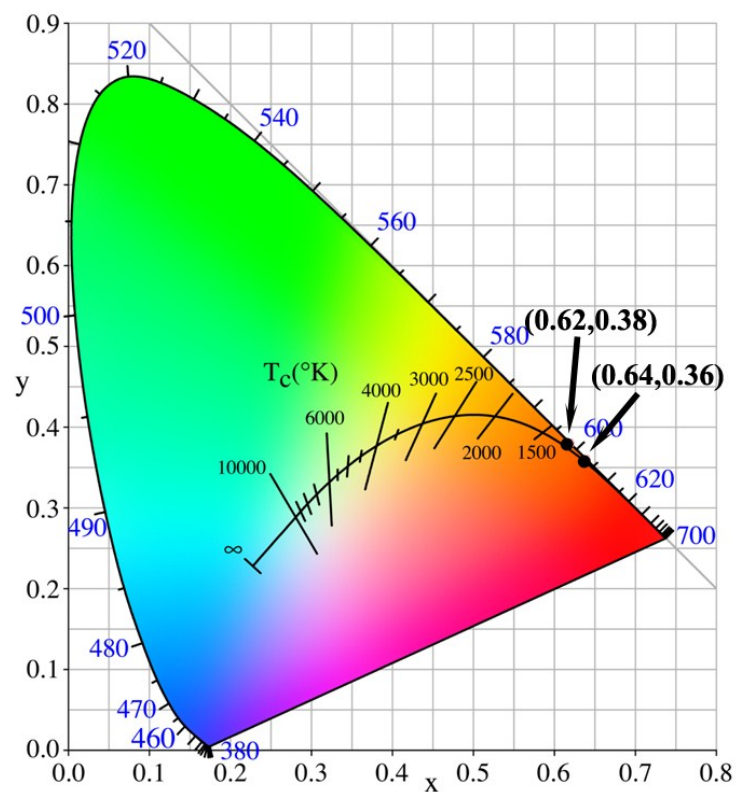

Fig. S5 CIE chromaticity diagram for the  $(Y_{0.95}Eu_{0.05})PO_4$  phosphors.

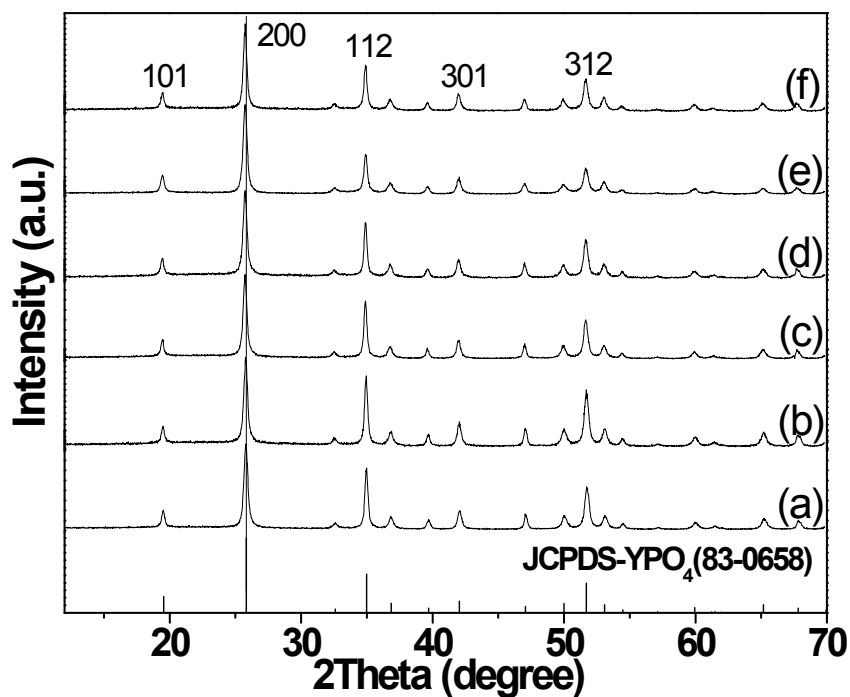

Fig. S6 XRD patterns of the  $(Y_{0.96-x}Tb_{0.04}Eu_x)PO_4$  phosphors calcined at 900 °C for 2 h under flowing  $H_2$  (200 mL  $min^{-1}$ ), with (a)  $x = 0$ , (b)  $x = 0.02$ , (c)  $x = 0.04$ , (d)  $x = 0.06$ , (e)  $x = 0.08$  and (f)  $x = 0.10$ .

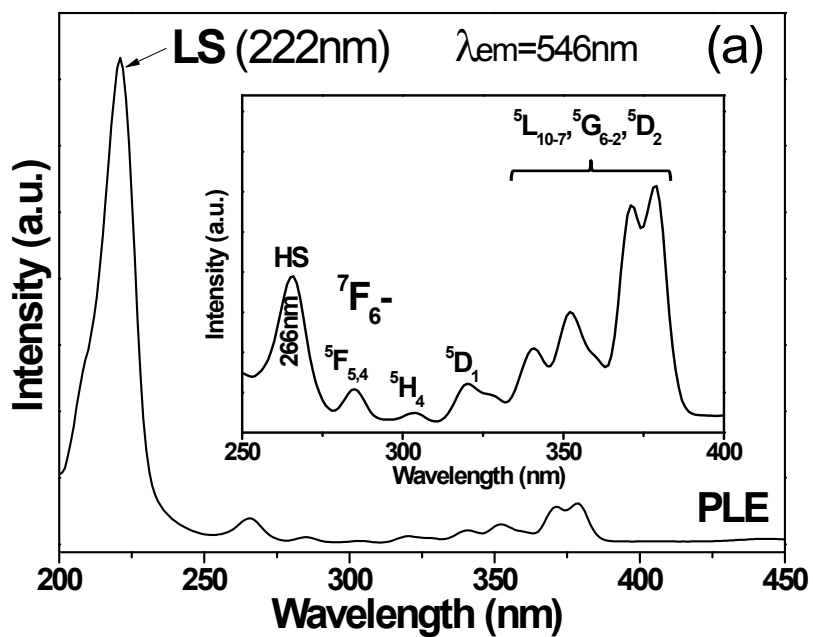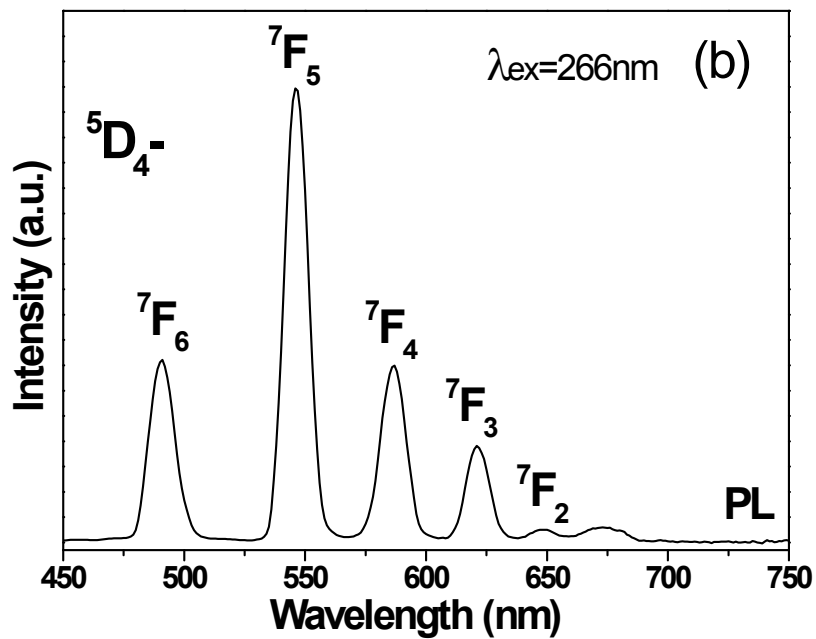

Fig. S7 PLE (a) and PL (b) spectra of the  $(Y_{0.96}Tb_{0.04})PO_4$  phosphor calcined at 900 °C. The inset in (a) is an amplified show of the  $Tb^{3+}$  transitions in the 250-400 nm region.

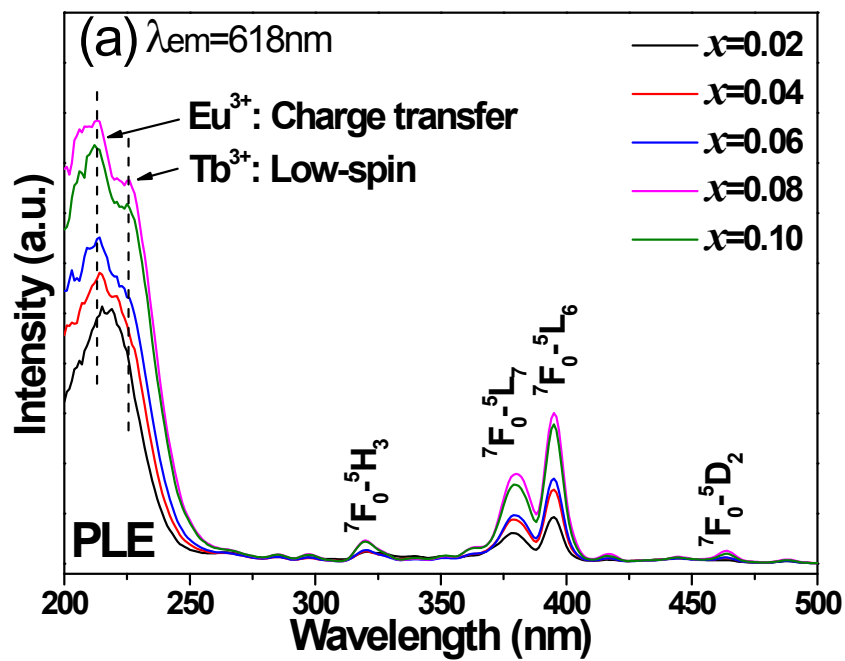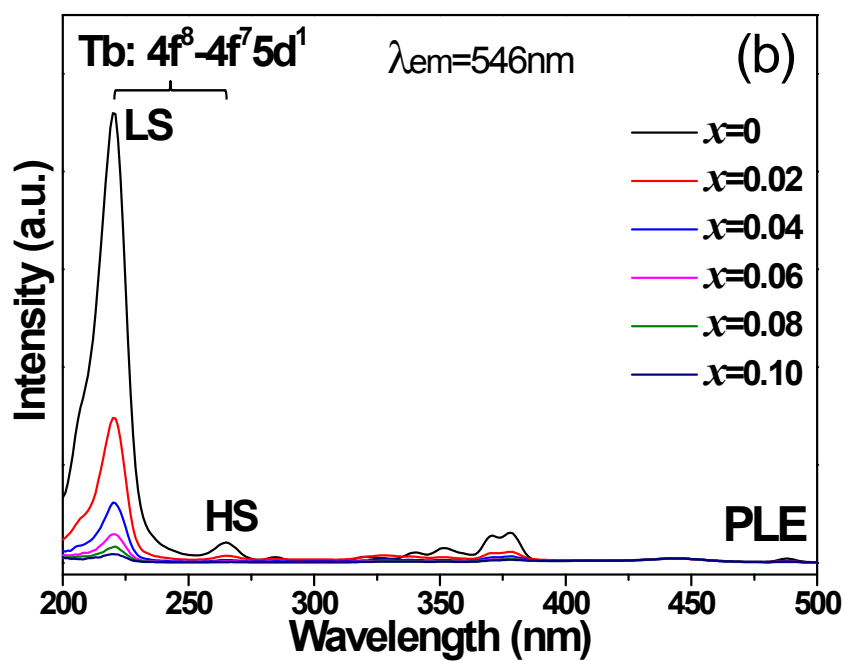

Fig. S8 Photoluminescence excitation (PLE) spectra of the  $(Y_{0.96-x}Tb_{0.04}Eu_x)PO_4$  phosphors calcined at 900 °C, with (a) and (b) for the 618 nm red emission of  $Eu^{3+}$  and the 546 nm green emission of  $Tb^{3+}$ , respectively.

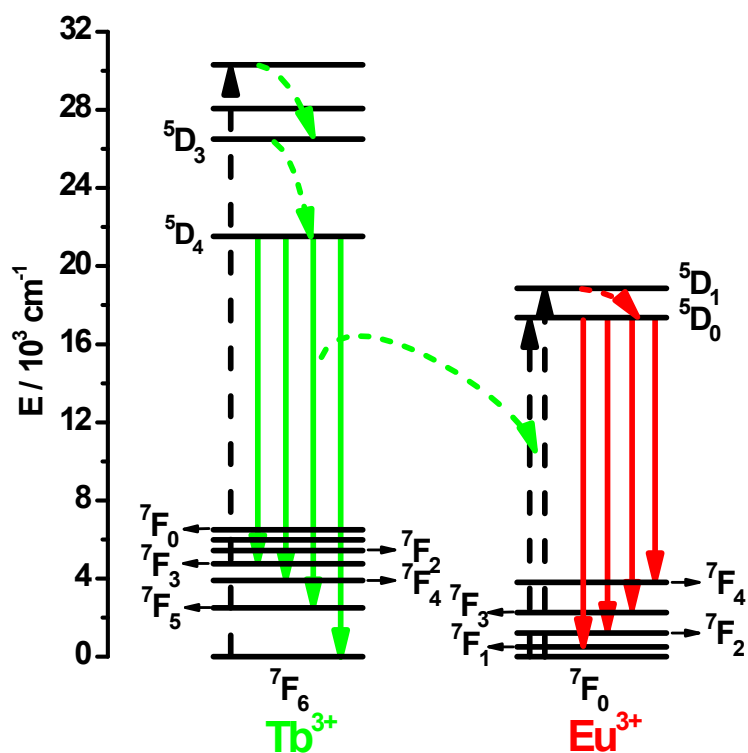

Fig. S9 A schematic model for the energy transfer from  $\text{Tb}^{3+}$  to  $\text{Eu}^{3+}$ .

Table S1 lattice constants  $a$  and  $c$  and cell volume  $V$  of the  $(\text{Y}_{0.96-x}\text{Tb}_{0.04}\text{Eu}_x)\text{PO}_4$  solid solutions calcined at 900 °C.

| $x$                          | 0      | 0.02   | 0.04   | 0.06   | 0.08   | 0.10   |
|------------------------------|--------|--------|--------|--------|--------|--------|
| 2 $\theta$ for 200/ $^\circ$ | 25.80  | 25.78  | 25.75  | 25.73  | 25.72  | 25.70  |
| 2 $\theta$ for 101/ $^\circ$ | 19.51  | 19.50  | 19.47  | 19.46  | 19.46  | 19.44  |
| $a/\text{\AA}$               | 6.902  | 6.906  | 6.915  | 6.919  | 6.922  | 6.927  |
| $c/\text{\AA}$               | 6.042  | 6.045  | 6.053  | 6.056  | 6.057  | 6.064  |
| $V/10^{-3} \text{ nm}^3$     | 287.83 | 288.30 | 289.44 | 289.92 | 290.22 | 290.97 |

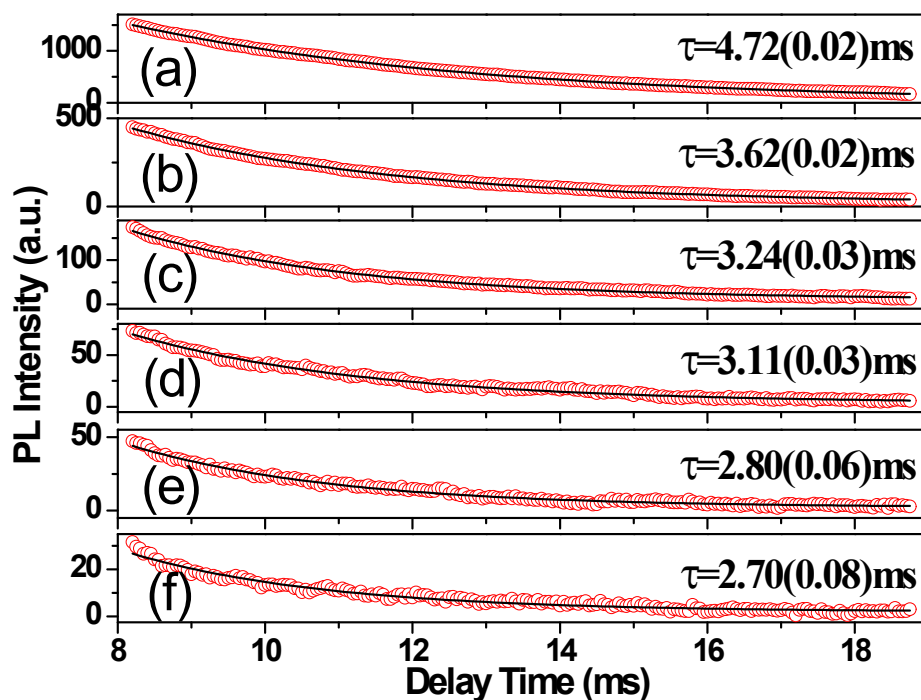

Fig. S10 Fluorescence decay kinetics (red) and the results of exponential fitting (black) for the 546-nm emission of  $\text{Tb}^{3+}$  in  $(\text{Y}_{0.96-x}\text{Tb}_{0.04}\text{Eu}_x)\text{PO}_4$ , with (a)  $x = 0$ , (b)  $x = 0.02$ , (c)  $x = 0.04$ , (d)  $x = 0.06$ , (e)  $x = 0.08$  and (f)  $x = 0.10$ .

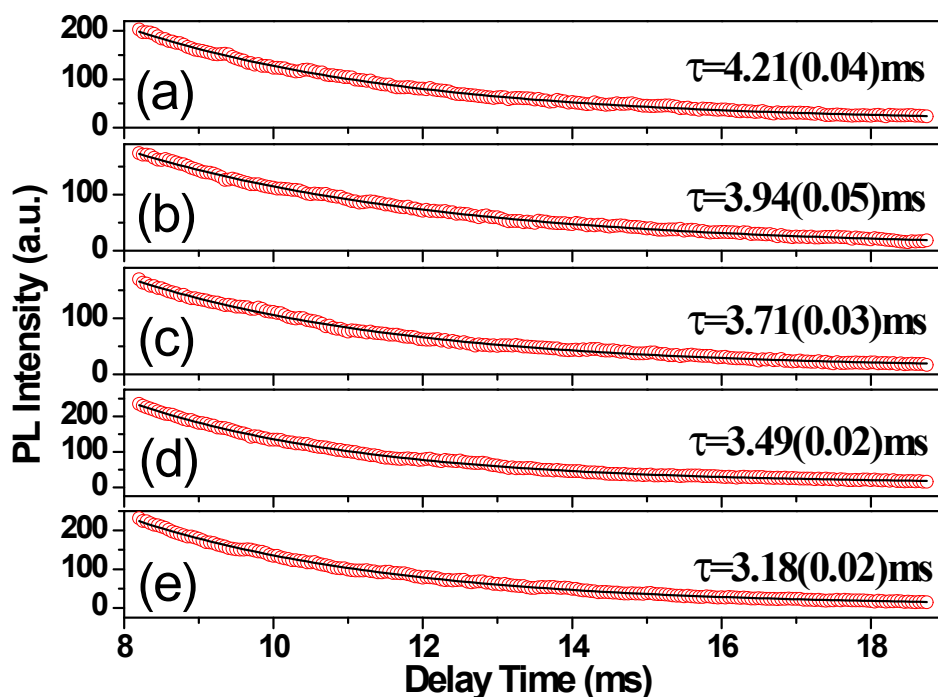

Fig. S11 Fluorescence decay kinetics (red) and the results of exponential fitting (black) for the 618-nm emission of  $\text{Eu}^{3+}$  in  $(\text{Y}_{0.96-x}\text{Tb}_{0.04}\text{Eu}_x)\text{PO}_4$ , with (a)  $x = 0.02$ , (b)  $x = 0.04$ , (c)  $x = 0.06$ , (d)  $x = 0.08$  and (e)  $x = 0.10$ .
